# Supplementary material for: Membrane Separation Technology in Direct Air Capture
Source: MDPI journal article supplement (doi:10.3390/membranes14020030), 2024-01-24
Supplement: s1 [file s1]

## Supporting information

### Membrane Separation Technology in Direct Air Capture

Pavlo Ignatusha <sup>1,2</sup>, Haiqing Lin <sup>3,\*</sup>, Noe Kapuscinsky <sup>1,4</sup>, Ludmila Scoles <sup>1</sup>, Weiguo Ma <sup>1</sup>, Bussaraporn Patarachao <sup>1</sup> and Naiying Du <sup>1,\*</sup>

Table S1: Summary of recent promising membrane materials showing permeabilities  $\geq 1000$  Barrer or permeances  $> \sim 1000$  GPU or greater with CO<sub>2</sub>/N<sub>2</sub> Selectivity's  $\geq 20$  at temperatures  $\leq 35$  °C. Inorganic membranes have not been included. Some additions are not mutually exclusive and could belong to several categories. Data is from pure gas permeation measurements unless otherwise specified.

| Polymeric Membranes |                                            |                | T<br>(°C) | Pressure<br>(kPa) | Permeance<br>(GPU) | Permeability<br>(Barrer) | Gas<br>selectivity<br>(CO <sub>2</sub> /N <sub>2</sub> ) | Ref  |     |
|---------------------|--------------------------------------------|----------------|-----------|-------------------|--------------------|--------------------------|----------------------------------------------------------|------|-----|
| Type                | Polymers                                   |                |           |                   |                    |                          |                                                          |      |     |
| Copolymers          | PIMs (polymers of intrinsic microporosity) |                |           |                   |                    |                          |                                                          |      |     |
|                     | PIM-1                                      |                | 30        | 20                | -                  | 2,300                    | 25                                                       | 75   |     |
|                     | PIM-1 + Methanol                           |                | 35        | 200               | -                  | 5,919                    | 24                                                       | 49   |     |
|                     | PIM-1 (Aged 2219 days)                     |                | 25        | 100               | -                  | 5,000                    | 22.0                                                     | 112  |     |
|                     | PIM-7                                      |                | 30        | 20                | -                  | 1,100                    | 26                                                       | 5    |     |
|                     | PIM-HPB                                    | As cast        | 100       | 100               | -                  | 1,640                    | 24.3                                                     | 113  |     |
|                     |                                            | After Methanol | 100       | 100               | -                  | 3,800                    | 20.0                                                     | 113  |     |
|                     |                                            | aged 145 days  | 100       | 100               | -                  | 2,390                    | 22.3                                                     | 113  |     |
|                     | PIM+CH <sub>3</sub> -HPB                   | After Methanol | 100       | 100               | -                  | 2,620                    | 21.4                                                     | 113  |     |
|                     |                                            | aged 147 days  | 100       | 100               | -                  | 1,630                    | 27.3                                                     | 113  |     |
|                     | PIM-Br-HPB                                 | After Methanol | 100       | 100               | -                  | 2,130                    | 23.0                                                     | 113  |     |
|                     |                                            | aged 146 days  | 100       | 100               | -                  | 1,430                    | 26.5                                                     | 113  |     |
|                     | PIM-CN-HPB                                 | aged 147 days  | 100       | 100               | -                  | 1,300                    | 24.7                                                     | 113  |     |
|                     | DPPD-TMPD                                  |                |           | 30                | 300                | -                        | 1,600                                                    | 21.9 | 114 |
|                     | TPE-PIM-50                                 |                |           | 35                | 200                | -                        | 1,869                                                    | 21.3 | 115 |
| TPE-PIM-25          |                                            |                | 35        | 200               | -                  | 5,203                    | 20.3                                                     | 115  |     |

|  |                              |                |       |     |   |        |      |     |
|--|------------------------------|----------------|-------|-----|---|--------|------|-----|
|  | PIM-PI-10                    |                | 20-22 | 100 | - | 2,154  | 25.6 | 82  |
|  | PIM-PI-8                     |                | 20-22 | 100 | - | 3,190  | 22.8 | 82  |
|  | PIM-PI-11                    |                | 20-22 | 100 | - | 1,523  | 23.4 | 82  |
|  | KAUST-PI-1                   |                | 35    | 200 | - | 2,389  | 33   | 40  |
|  | KAUST-PI-2                   |                | 35    | 200 | - | 2,071  | 21   | 40  |
|  | KAUST-PI-7                   |                | 35    | 200 | - | 4,391  | 20   | 40  |
|  | TBDA2-SBI-PI                 |                | 35    | 100 | - | 1,213  | 24.8 | 116 |
|  | PIM-BTrip (160 µm)           | Aged 130 days  | 100   | 100 | - | 13,200 | 25.3 | 41  |
|  |                              | Aged 253 days  | 100   | 100 | - | 10,700 | 26.7 | 41  |
|  |                              | Aged 365 days  | 100   | 100 | - | 8,020  | 28.6 | 41  |
|  |                              | Aged 490 days  | 100   | 100 | - | 6,060  | 31.0 | 41  |
|  |                              | Aged 633 days  | 100   | 100 | - | 4,350  | 34.2 | 41  |
|  |                              | Aged 718 days  | 100   | 100 | - | 3,770  | 33.8 | 41  |
|  | PIM-BTrip (64 µm)            | Aged 0 days    | 100   | 100 | - | 9,200  | 27.1 | 41  |
|  |                              | Aged 120 days) | 100   | 100 | - | 6,040  | 30.2 | 41  |
|  |                              | Aged 253 days  | 100   | 100 | - | 5,990  | 31.5 | 41  |
|  |                              | Aged 371 days  | 100   | 100 | - | 5,150  | 33.4 | 41  |
|  | PIM-HMI-Trip (135 µm)        | Aged 426 days  | 100   | 100 | - | 16,400 | 20.4 | 41  |
|  | PIM-TFM-BTrip (176 µm)       | Aged 123 days  | 100   | 100 | - | 22,100 | 20.3 | 41  |
|  |                              | Aged 255 days  | 100   | 100 | - | 18,400 | 21.0 | 41  |
|  |                              | Aged 367 days  | 100   | 100 | - | 17,000 | 21.5 | 41  |
|  |                              | Aged 496 days  | 100   | 100 | - | 15,600 | 21.6 | 41  |
|  | PIM-DTFM-BTrip (112 µm)      | Aged 636 days  | 100   | 100 | - | 14,800 | 20.0 | 41  |
|  | PIM-DM-BTrip (114 µm)        | Aged 0 days    | 100   | 100 | - | 22,000 | 21.8 | 41  |
|  |                              | Aged 128 days  | 100   | 100 | - | 12,200 | 23.4 | 41  |
|  | DFTTB                        | Aged 0 days    | 200   | 200 | - | 3,146  | 28.9 | 117 |
|  |                              | Aged 7 days    | 200   | 200 | - | 2,102  | 27.7 | 117 |
|  |                              | Aged 180 days  | 200   | 200 | - | 1,005  | 23.4 | 117 |
|  | ITTB                         | Aged 0 days    | 200   | 200 | - | 3,901  | 20.9 | 117 |
|  |                              | Aged 30 days   | 200   | 200 | - | 2,203  | 22.7 | 117 |
|  |                              | Aged 150 days  | 200   | 200 | - | 1,370  | 22.5 | 117 |
|  | PIM-Trip-TB                  | Aged 100 days  | 200   | 200 | - | 3,951  | 20.9 | 117 |
|  | PIM-SBI-Trip (Aged 501 days) |                | 25    | 100 | - | 11,500 | 24.4 | 112 |
|  | PIM-PI-1                     |                | 30    | -   | - | 1,100  | 23.4 | 83  |
|  | PIM-PI-8i                    |                | 30    | -   | - | 3,700  | 23.1 | 83  |
|  | PIM-PI-8ii                   |                | 30    | -   | - | 2,270  | 22.7 | 83  |
|  | TPIM-1                       |                | 25    | 200 | - | 1,549  | 28.7 | 118 |
|  | PAO-PIM-1                    |                | 35    | 100 | - | 2,902  | 28   | 61  |
|  | NTDA-TMDAT                   |                | 35    | 200 | - | 1,441  | 20.6 | 119 |
|  | BCDA-TMDAT                   |                | 35    | 200 | - | 1,015  | 22.1 | 119 |

|  |                             |                |     |       |   |                    |            |     |
|--|-----------------------------|----------------|-----|-------|---|--------------------|------------|-----|
|  | TPDA-TMPD                   |                | 35  | 200   | - | 2,389              | 22.3       | 119 |
|  | Bio-PITB-1-Vac              | Aged 0 days    | 100 | 100   | - | 1,123              | 22         | 120 |
|  |                             | Aged 100 days  | 100 | 100   | - | 1,008              | 22         | 120 |
|  | Bio-PITB-1-Air              | Aged 0 days    | 100 | 100   | - | 1,352              | 21         | 120 |
|  |                             | Aged 100 days  | 100 | 100   | - | 1,076              | 22         | 120 |
|  | Bio-PITB-2-Vac              | Aged 0 days    | 100 | 100   | - | 1,201              | 22         | 120 |
|  |                             | Aged 100 days  | 100 | 100   | - | 1,087              | 22         | 120 |
|  | Bio-PITB-2-Air              | Aged 0 days    | 100 | 100   | - | 1,384              | 22         | 120 |
|  |                             | Aged 100 days  | 100 | 100   | - | 1,161              | 23         | 120 |
|  | SBFDA-DMN (day 10)          |                | 35  | 200   | - | 3,049              | 21.3       | 121 |
|  | PIM-PI-12                   |                | 35  | 200   | - | 3,230              | 24.5       | 121 |
|  | PIM-SBF-1                   | Aged 0 days    | 100 | 100   | - | 8,850              | 26         | 78  |
|  |                             | Aged 2088 days | 100 | 100   | - | 2,410              | 27.5       | 78  |
|  | PIM-SBF-2                   | Aged 1295 days | 100 | 100   | - | 3,870              | 23.3       | 78  |
|  | PIM-SBF-3                   | Aged 0 days    | 100 | 100   | - | 10,900             | 23.5       | 78  |
|  |                             | Aged 1294 days | 100 | 100   | - | 4,850              | 22.8       | 78  |
|  | CTB1-DMN                    |                | 35  | 200   | - | 1,661              | 21.8       | 122 |
|  | PIM-EA(H2)-TB               |                | 25  | 100   | - | 1,445 <sup>a</sup> | 29.25      | 123 |
|  | PIM-EA(H2)-TB               |                | 25  | 100   | - | 1391               | 26.20      | 123 |
|  | PIM-Trip-TB (Aged 470 Days) |                | 25  | 100   | - | 3,951              | 21.0       | 124 |
|  | PIM-CO15                    |                | 30  | 20-70 | - | 1,070              | 26.8       | 125 |
|  | PIM-CO15                    |                | 30  | 20-70 | - | 2,000              | 24.1       | 125 |
|  | PIM1-CO15-75                |                | 30  | 20-70 | - | 2,570              | 23.4       | 125 |
|  | PIM1-CO15-50                |                | 30  | 20-70 | - | 4,600              | 21.9       | 125 |
|  | PIMCO1-CO15-50              |                | 30  | 20-70 | - | 5,400              | 22.5       | 125 |
|  | PIMCO2-CO15-50              |                | 30  | 20-70 | - | 5,300              | 20.4       | 125 |
|  | PIMCO6-CO15-50              |                | 30  | 20-70 | - | 3,800              | 22.4       | 125 |
|  | PIMCO19-CO15-50             |                | 30  | 20-70 | - | 3,400              | 22.7       | 125 |
|  | PHPIM101                    |                | 30  | 100   | - | 4,627              | 25.1       | 126 |
|  | PHPIM081                    |                | 30  | 100   | - | 3,237              | 27.5       | 126 |
|  | PHPIM061                    |                | 30  | 100   | - | 2,718              | 24.1       | 126 |
|  | PHPIM041                    |                | 30  | 100   | - | 1,850              | 26.1       | 126 |
|  | PIM-bpy-5                   |                | 35  | 200   | - | 5,141 ± 310        | 21.2 ± 1.3 | 77  |
|  | PIM-bpy-10                  |                | 35  | 200   | - | 4,917 ± 295        | 22.0 ± 1.5 | 77  |
|  | PIM-bpy-15                  |                | 35  | 200   | - | 4,035 ± 262        | 22.2 ± 1.7 | 77  |
|  | SFX-PIM-33                  |                | 25  | 200   | - | 3,595              | 23.5       | 42  |
|  | SFX-PIM-33 (Aged 130 days)  |                | 25  | 200   | - | 1,848              | 30.8       | 42  |
|  | SFX-PIM-25 (Aged 130 days)  |                | 25  | 200   | - | 2,120              | 20.2       | 42  |

<sup>a</sup> Mixed gas. v CO<sub>2</sub>: v N<sub>2</sub>= 15 : 85

|                                                                        |    |        |                     |            |      |     |
|------------------------------------------------------------------------|----|--------|---------------------|------------|------|-----|
| PEO containing polymer                                                 |    |        |                     |            |      |     |
| PDMS <sup>5</sup> /O <sub>2</sub> <sup>0.6</sup> /Pebax <sup>0.3</sup> | 25 | 200    | 3,574 ± 413         | -          | 22.5 | 32  |
| PDMS <sup>5</sup> /O <sub>2</sub> <sup>0.7</sup> /Pebax <sup>0.3</sup> | 25 | 200    | 3,292 ± 239         | -          | 37.0 | 32  |
| PDMS <sup>5</sup> /O <sub>2</sub> <sup>0.8</sup> /Pebax <sup>0.3</sup> | 25 | 200    | 2,742 ± 41          | -          | 42.9 | 32  |
| PDMS <sup>5</sup> /O <sub>2</sub> <sup>0.9</sup> /Pebax <sup>0.3</sup> | 25 | 200    | 1,511 ± 85          | -          | 53.1 | 32  |
| PDMS <sup>5</sup> /O <sub>2</sub> <sup>1.0</sup> /Pebax <sup>0.3</sup> | 25 | 200    | 1,249 ± 155         | -          | 71.9 | 32  |
| PDMS <sup>5</sup> /O <sub>2</sub> <sup>0.7</sup> /Pebax <sup>0.2</sup> | 25 | 200    | 3,233 ± 396         | -          | 21.1 | 32  |
| PDMS <sup>5</sup> /O <sub>2</sub> <sup>0.7</sup> /Pebax <sup>0.3</sup> | 25 | 200    | 3,292 ± 239         | -          | 37.0 | 32  |
| PDMS <sup>5</sup> /O <sub>2</sub> <sup>0.7</sup> /Pebax <sup>0.4</sup> | 25 | 200    | 2,516 ± 293         | -          | 47.7 | 32  |
| PDMS <sup>5</sup> /O <sub>2</sub> <sup>0.7</sup> /Pebax <sup>0.5</sup> | 25 | 200    | 1931 ± 147          | -          | 30.0 | 32  |
| Pebax 1657/67 on Plasma Treated PDMS                                   | 25 | 100    | 1,140 <sup>b</sup>  | -          | 44   | 127 |
| Pebax 1657/45 on Plasma Treated PDMS                                   | 25 | 100    | 1,614 <sup>b</sup>  | -          | 37   | 127 |
| Pebax 1657/35 on Plasma Treated PDMS                                   | 25 | 100    | 2,022 <sup>b</sup>  | -          | 29   | 127 |
| HPEO2-800                                                              | 35 | 70-200 | 1,000               | -          | 39   | 128 |
| BPM-0                                                                  | 35 | 350    | -                   | 1,711      | 44   | 43  |
| BPM-10                                                                 | 35 | 350    | -                   | 2,036      | 44   | 43  |
| BPM-20                                                                 | 35 | 350    | -                   | 2,674      | 46   | 43  |
| BPM-30                                                                 | 35 | 350    | -                   | 3,277      | 44   | 43  |
| BPM-40                                                                 | 35 | 350    | -                   | 4,169      | 44   | 43  |
| BPM-50                                                                 | 35 | 350    | -                   | 4,883      | 43   | 43  |
| EO-21 (DAmPEG-0.0064)                                                  | 22 | 500    | 1,310 <sup>a</sup>  | -          | 33   | 129 |
| EO-21 (DAmPEG-0.0016)                                                  | 22 | 500    | 1,264 <sup>a</sup>  | -          | 37   | 129 |
| EO-21 (DAmPEG-0.0032)                                                  | 22 | 500    | 1,308 <sup>a</sup>  | -          | 35   | 129 |
| EO-3 (TMC- 0.0094)                                                     | 22 | 110    | 1,287 <sup>a</sup>  | -          | 39   | 129 |
| EO-3 (TMC- 0.0104)                                                     | 22 | 110    | ~1,000 <sup>a</sup> | -          | 84   | 129 |
| Thermally Rearranged Polymers                                          |    |        |                     |            |      |     |
| TPBO-0.25                                                              | 35 | 300    | -                   | 1,213 ± 28 | ~21  | 87  |
| TPBO-Ac-0.25                                                           | 35 | 300    | -                   | 1,433 ± 30 | ~20  | 87  |
| 6FDA-SBF-PBO (420 °C)                                                  | 35 | 200    | -                   | 1,160      | 21.1 | 88  |
| SPDA-SBF-PBO (450 °C)                                                  | 35 | 200    | -                   | 1,280      | 20.8 | 88  |
| PI-S1-425                                                              | 35 | 200    | -                   | 1,389      | 20.8 | 130 |
| TR-BMI-6F (450°C)                                                      | 35 | 100    | -                   | 5,440      | 23   | 131 |
| tTR-450(tTR-PBO)                                                       | 35 | 100    | -                   | 3,575      | 23.1 | 132 |
| PBI (450 °C)                                                           | 25 | -      | -                   | 1,624      | 26.2 | 133 |
| PBO-co-PPL 55 (450 °C)                                                 | 25 | 100    | -                   | 1,805      | 21   | 134 |
| TOX-PIM-1                                                              | 22 | 100    | -                   | 1,100      | 37   | 85  |
| Other type                                                             |    |        |                     |            |      |     |

<sup>b</sup> Mixed gas. v CO<sub>2</sub>: v N<sub>2</sub>= 20 : 80

|                                   |                                       |          |       |     |             |                    |            |     |
|-----------------------------------|---------------------------------------|----------|-------|-----|-------------|--------------------|------------|-----|
|                                   | VAP7                                  |          | 30    | 100 | -           | 1,370              | 32         | 44  |
|                                   | PTCNSi(OMe) <sub>3</sub>              |          | 20-22 | 100 | -           | 2,000              | 35.7       | 45  |
|                                   | PTCNSi(OEt) <sub>3</sub>              |          | 20-22 | 100 | -           | 1,000              | 21.3       | 45  |
| Copolymers with post modification | TZ-PIM-1                              |          | 25    | 440 | -           | ~3,000             | ~30        | 49  |
|                                   | DC-PIM4                               |          | 25    | 350 | -           | 1,536              | 25.9       | 135 |
|                                   | DC-PIM5                               |          | 25    | 350 | -           | 1,291              | 28.8       | 135 |
|                                   | PIM-UV (10 min)                       |          | 35    | 350 | -           | 4,560              | 20.2       | 136 |
|                                   | AO-PIM-1 +Methanol                    |          | 35    | 200 | -           | 1,153              | 35         | 49  |
|                                   | 4% w/v D-cPIM-1-70%                   |          | 25    | 250 | 7,700 ± 507 | -                  | 57 ± 15    | 71  |
|                                   | 4% w/v B-cPIM-1-73%                   |          | 25    | 250 | 2,900 ± 130 | -                  | 77 ± 25    | 71  |
|                                   | PIM-1-UV (in quartz)/Ozone            | 5 mins   | 400   | 400 | -           | 6,960              | 20.7       | 84  |
|                                   |                                       | 10 mins  | 400   | 400 | -           | 6,721              | 25.6       | 84  |
|                                   |                                       | 20 mins  | 400   | 400 | -           | 3,781              | 27.7       | 84  |
|                                   |                                       | 30 mins  | 400   | 400 | -           | 2,394              | 28.4       | 84  |
|                                   |                                       | 40 mins  | 400   | 400 | -           | 1,364              | 32.4       | 84  |
|                                   | PIM-1-UV (in air)/Ozone               | 5 mins   | 400   | 400 | -           | 6,007              | 20.9       | 84  |
|                                   |                                       | 10 mins  | 400   | 400 | -           | 6,374              | 21.6       | 84  |
|                                   |                                       | 20 mins  | 400   | 400 | -           | 4,374              | 22.1       | 84  |
|                                   |                                       | 30 mins  | 400   | 400 | -           | 1,555              | 26.9       | 84  |
|                                   |                                       | 40 mins  | 400   | 400 | -           | 1,535              | 25.6       | 84  |
|                                   |                                       | 60 mins  | 400   | 400 | -           | 1,147              | 30.0       | 84  |
|                                   | PIM-250                               | 1.0 d    | 350   | 350 | -           | 2,220              | 20.7       | 86  |
|                                   |                                       | 2.0 d    | 350   | 350 | -           | 1,968              | 25.9       | 86  |
|                                   | PIM-300                               | 0.5 d    | 350   | 350 | -           | 2,496              | 25.3       | 86  |
|                                   |                                       | 1.0 d    | 350   | 350 | -           | 3,083              | 30.7       | 86  |
|                                   |                                       | 1.5 d    | 350   | 350 | -           | 3,339              | 31.4       | 86  |
|                                   |                                       | 2.0 d    | 350   | 350 | -           | 4,000              | 41.7       | 86  |
|                                   | MTZ100-PIM                            |          | 25    | 350 | -           | 1,391              | 22.2       | 50  |
|                                   |                                       |          | 25    | 350 | -           | 1,674 <sup>c</sup> | 39.9       | 50  |
|                                   |                                       |          | 25    | 350 | -           | 1,780 <sup>d</sup> | 39.0       | 50  |
|                                   |                                       |          | 25    | 350 | -           | 2,057 <sup>b</sup> | 41.6       | 50  |
|                                   | Ester-Crosslinked COOH PIM-1 (200 °C) | 2h       | 200   | 200 | -           | 6,489              | 20.4       | 137 |
|                                   |                                       | 12h      | 200   | 200 | -           | 6,347              | 21.0       | 137 |
|                                   |                                       | 24h      | 200   | 200 | -           | 3,654              | 20.5       | 137 |
|                                   | sPIM-1                                |          | 25    | 140 | -           | 5,928.8 ± 111.7    | 23.5 ± 0.9 | 57  |
|                                   | SBFDA-DMN                             | Pristine | 200   | 200 | -           | 4,700              | 20.8       | 138 |

<sup>c</sup> Mixed gas. v CO<sub>2</sub>: v N<sub>2</sub>= 40 : 60

<sup>d</sup> Mixed gas. v CO<sub>2</sub>: v N<sub>2</sub>= 30 : 70

|                |                                              |                |     |          |       |                         |            |     |
|----------------|----------------------------------------------|----------------|-----|----------|-------|-------------------------|------------|-----|
|                |                                              | 500 °C         | 200 | 200      | -     | 1,500                   | 22.7       | 138 |
|                |                                              | 600 °C         | 200 | 200      | -     | 2,853                   | 25.9       | 138 |
|                | Thioamide-PIM-1 + Ethanol                    |                | 25  | 100      | -     | 1,120                   | 30.3       | 51  |
|                | cPIM-1/PPN <sub>2</sub> -3%                  |                | 25  | 200      | -     | 11,511 ± 97             | 24.3       | 52  |
|                | cPIM-1                                       |                | 25  | 200      | -     | 3,739 ± 32              | 34.9       | 52  |
| Matrix polymer | 30%Ag+@10%UiO-66-NH <sub>2</sub> -PIM MMM    |                | 25  | 200-1000 | -     | >15,000 <sup>e</sup>    | ~30        | 94  |
|                | PIM-1/MOF-74-Ni                              |                | 35  | 100      | 5,018 | -                       | 31         | 91  |
|                | PIM-1/MOF-74-Ni (Aged 8 weeks)               |                | 35  | 100      | 1,200 | -                       | 30         | 91  |
|                | PIM-1/NH <sub>2</sub> -UiO-66                |                | 35  | 100      | 7,460 | -                       | 26         | 91  |
|                | PIM-1/NH <sub>2</sub> -UiO-66 (Aged 8 weeks) |                | 35  | 100      | 900   | -                       | 26         | 91  |
|                | ODPA-TMPDA                                   | 10wt % PS-MFI  | 35  | 100      | -     | 2,275 ± 82 <sup>f</sup> | 26.1 ± 0.3 | 139 |
|                |                                              | 20wt % PS-MFI  | 35  | 100      | -     | 2,280 ± 80 <sup>f</sup> | 28.3 ± 2.1 | 139 |
|                |                                              | 30wt % PS-MFI  | 35  | 100      | -     | 2,397 ± 18 <sup>f</sup> | 28.8 ± 0.4 | 139 |
|                |                                              | 10wt % ETS-10  | 35  | 100      | -     | 1,056 ± 17 <sup>f</sup> | 33.8 ± 0.7 | 139 |
|                |                                              | 20wt % ETS-10  | 35  | 100      | -     | 1,225 ± 62 <sup>f</sup> | 36.6 ± 1.7 | 139 |
|                |                                              | 30wt % ETS-10  | 35  | 100      | -     | 1,234 ± 22 <sup>f</sup> | 34.2 ± 1.2 | 139 |
|                |                                              | 10wt % SAPO-34 | 35  | 100      | -     | 1,167 ± 51 <sup>f</sup> | 30.4 ± 1.0 | 139 |
|                |                                              | 20wt % SAPO-34 | 35  | 100      | -     | 2,248 ± 42 <sup>f</sup> | 33.2 ± 0.7 | 139 |
|                |                                              | 30wt % SAPO-34 | 35  | 100      | -     | 2,615 ± 34 <sup>f</sup> | 31.7 ± 0.1 | 139 |
|                | UiO-66-NH <sub>2</sub> @PIM-1/MEEP80         | 10%            | 22  | 150      | -     | 4,968 <sup>g</sup>      | 22.5       | 92  |
|                |                                              | 20%            | 22  | 150      | -     | 5,870 <sup>g</sup>      | 21.9       | 92  |
|                |                                              | 30%            | 22  | 150      | -     | 5,970 <sup>g</sup>      | 22.5       | 92  |
|                | 6FDA-durene/Si-1                             |                | 25  | 200      | -     | 1,783                   | 29         | 53  |
|                | 6FDA-durene/Si-2                             |                | 25  | 200      | -     | 1,967                   | 29         | 53  |
|                | 6FDA-durene/Si-3                             |                | 25  | 200      | -     | 2,439                   | 30         | 53  |
|                | 6FDA-durene/Si-4                             |                | 25  | 200      | -     | 3,293                   | 31         | 53  |
|                | 6FDA-durene/Si-5                             |                | 25  | 200      | -     | 3,785                   | 31         | 53  |
|                | PIM-MFI3                                     |                | 25  | 100      | -     | 2,530                   | 30         | 54  |
|                | Pebax-2533/ZIF                               | 25%            | 25  | 200      | -     | 1,082                   | 31.3       | 55  |
|                |                                              | 30%            | 25  | 200      | -     | 1,176                   | 31.6       | 55  |
|                |                                              | 35%            | 25  | 200      | -     | 1,287                   | 32.3       | 55  |
|                | PVC-g-POEM/ZIF-8 (40%)                       |                | 35  | 10       | -     | 1,195.4                 | 26.1       | 140 |
|                | SPEEK/MIL-101 (Cr) 40%                       |                | 30  | 100      | -     | 1,623 <sup>h</sup>      | 40         | 56  |
|                | SPEEK/S-MIL-101 (Cr) 40%                     |                | 30  | 100      | -     | 2,064 <sup>h</sup>      | 53         | 56  |
|                | PAN/UIO66-NH <sub>2</sub>                    |                | 35  | 100      | 3,691 | -                       | 92.5       | 93  |

<sup>e</sup> Mixed gas. 1 : 9 in mol

<sup>f</sup> Mixed gas. 21 : 79 CO<sub>2</sub>/N<sub>2</sub>

<sup>g</sup> Mixed gas. 20 : 20 : 60 % mol CO<sub>2</sub>/N<sub>2</sub>/Dry Ar

<sup>h</sup> Humidified gas

|  |                                                     |                     |    |      |                       |                               |            |     |
|--|-----------------------------------------------------|---------------------|----|------|-----------------------|-------------------------------|------------|-----|
|  | PAN/ZIF-8                                           |                     | 35 | 100  | 3,596                 | -                             | 80.3       | 93  |
|  | PAN/UIO66-NH <sub>2</sub>                           |                     | 35 | 100  | 3,586 <sup>i</sup>    | -                             | 90.1       | 93  |
|  | SAPO-34 (PM-30 wt % )                               |                     | 25 | 2000 | -                     | 5,753                         | 31         | 58  |
|  | PTO                                                 |                     | 30 | 100  | 737 ± 38              | -                             | 38.0 ± 2.9 | 141 |
|  | PTO-U5                                              |                     | 30 | 100  | 801 ± 11              | -                             | 39.2 ± 1.2 | 141 |
|  | PTO-U10                                             |                     | 30 | 100  | 1,070 ± 76            | -                             | 41.0 ± 0.8 | 141 |
|  | PTO-U15                                             |                     | 30 | 100  | 1,108 ± 16            | -                             | 38.7 ± 0.8 | 141 |
|  | PTO-U20                                             |                     | 30 | 100  | 1,467 ± 42            | -                             | 34.5 ± 2.2 | 141 |
|  | PTO-U30                                             |                     | 30 | 100  | 1,828 ± 161           | -                             | 32.4 ± 1.9 | 141 |
|  | MXene/PEG (400)                                     |                     | 25 | 100  | 1,543.13              | -                             | 30.90      | 142 |
|  |                                                     |                     | 25 | 100  | 1,408.94 <sup>i</sup> | -                             | 28.18      | 142 |
|  | MXene/PEG (600)                                     |                     | 25 | 100  | 1,626.99              | -                             | 32.18      | 142 |
|  | MXene/PEG (600)                                     |                     | 25 | 100  | 1,912.14 <sup>i</sup> | -                             | 31.24      | 142 |
|  | EM400/MIL-101(Cr)-NH <sub>2</sub> /TPP (60wt % TPP) |                     | 35 | 100  | -                     | 1,288.3                       | 22.2       | 100 |
|  | UiO-66-CN/PIM-1                                     |                     | 25 | 140  | -                     | 7,070.9 ± 46.2                | 26.7 ± 1.8 | 57  |
|  | UiO-66-CN@sPIM-1                                    |                     | 25 | 140  | -                     | 16,121.3 ± 138.9              | 27.0 ± 0.6 | 57  |
|  | UiO-66-CN@sPIM-1                                    |                     | 25 | 140  | -                     | 12,063.3 ± 106.2 <sup>i</sup> | 53.5 ± 4.1 | 57  |
|  | NUS-8-NH <sub>2</sub> /PIM-1                        | 1.6%                | 25 | 200  | -                     | 10,528 <sup>b</sup>           | 25         | 143 |
|  |                                                     | 2.5%                | 25 | 200  | -                     | 10,819 <sup>b</sup>           | 28.2       | 143 |
|  |                                                     | 5.6%                | 25 | 200  | -                     | 11,573 <sup>b</sup>           | 30.7       | 143 |
|  |                                                     | 10.4%               | 25 | 200  | -                     | 14,638 <sup>b</sup>           | 29.2       | 143 |
|  |                                                     | 13.0%               | 25 | 200  | -                     | 14,622 <sup>b</sup>           | 24.7       | 143 |
|  |                                                     | 15.0%               | 25 | 200  | -                     | 14,039 <sup>b</sup>           | 24.9       | 143 |
|  | PIM-1/UiO-66(Zr)                                    | 9.1 wt%             | 25 | 100  | -                     | 5,940                         | 23.2       | 144 |
|  |                                                     | 16.6 wt%            | 25 | 100  | -                     | 7,610                         | 20.7       | 144 |
|  |                                                     | 16.6 wt% + Methanol | 25 | 100  | -                     | 9,980                         | 21.6       | 144 |
|  |                                                     | 23.1 wt%            | 25 | 100  | -                     | 7,610                         | 20.7       | 144 |
|  |                                                     | 23.1 wt% + Methanol | 25 | 100  | -                     | 9,980                         | 21.6       | 144 |
|  | PIM-1/UiO-66(Zr)(CO <sub>2</sub> H) <sub>2</sub>    | 9.1 wt%             | 25 | 100  | -                     | 4,600                         | 21         | 144 |
|  |                                                     | 16.6 wt%            | 25 | 100  | -                     | 5,190                         | 20         | 144 |
|  |                                                     | 23.1 wt%            | 25 | 100  | -                     | 5,300                         | 20         | 144 |
|  |                                                     | 28.6 wt%            | 25 | 100  | -                     | 6,090                         | 21         | 144 |
|  |                                                     | 28.6 wt% + Methanol | 25 | 100  | -                     | 9,020                         | 22         | 144 |
|  | PIM-1/UiO-66(Zr)-NH <sub>2</sub>                    | 9.1 wt%             | 25 | 100  | -                     | 4,810                         | 22.3       | 144 |
|  |                                                     | 9.1 wt% + Methanol  | 25 | 100  | -                     | 8,740                         | 22.0       | 144 |
|  |                                                     | 16.6 wt%            | 25 | 100  | -                     | 6,340                         | 20.9       | 144 |
|  |                                                     | 16.6 wt% + Methanol | 25 | 100  | -                     | 10,700                        | 21.45      | 144 |

<sup>i</sup> Mixed gas. v CO<sub>2</sub>: v N<sub>2</sub>= 50 : 50

|  |                                    |                     |    |     |       |                             |            |     |
|--|------------------------------------|---------------------|----|-----|-------|-----------------------------|------------|-----|
|  |                                    | 23.1 wt%            | 25 | 100 | -     | 5,070                       | 20         | 144 |
|  |                                    | 23.1 wt% + Methanol | 25 | 100 | -     | 9,570                       | 23         | 144 |
|  |                                    | 28.6 wt%            | 25 | 100 | -     | 6,310                       | 22         | 144 |
|  |                                    | 28.6 wt% + Methanol | 25 | 100 | -     | 9,030                       | 20         | 144 |
|  | PIM-1/GO                           |                     | 30 | 400 | -     | 6,169                       | 123        | 59  |
|  | PZ-10                              |                     | 30 | 100 | 1,219 | -                           | 41.4       | 145 |
|  | PZ-20                              |                     | 30 | 100 | 1,308 | -                           | 39.7       | 145 |
|  | PZ-30                              |                     | 30 | 100 | 1,642 | -                           | 36.7       | 145 |
|  | PZ-40                              |                     | 30 | 100 | 2,821 | -                           | 35.7       | 145 |
|  | PZ-50                              |                     | 30 | 100 | 4,474 | -                           | 32.0       | 145 |
|  | PZ-60                              |                     | 30 | 100 | 6,942 | -                           | 24.1       | 145 |
|  | Pebax/ZIF-8                        | 30%                 | 30 | 100 | 1,394 | -                           | 22.9       | 145 |
|  | PIM-1/SNW-1(5)                     |                     | 30 | 200 | -     | 6,080                       | 21.7       | 146 |
|  | PIM-1/SNW-1(10)                    |                     | 30 | 200 | -     | 7,553                       | 22.7       | 146 |
|  | PAO-PIM-1/NH <sub>2</sub> -UiO-66  | 7%                  | 35 | 100 | -     | 3,825                       | 30.0       | 61  |
|  |                                    | 15%                 | 35 | 100 | -     | 4,832                       | 28.9       | 61  |
|  |                                    | 30%                 | 35 | 100 | -     | 8,425                       | 27.5       | 61  |
|  | PAO-PIM-1/UiO-66                   | 30%                 | 35 | 100 | -     | 8,126                       | 22.5       | 61  |
|  | PIM-20ZIF                          |                     | 35 | 350 | -     | 5,942                       | 20         | 147 |
|  | UV-10ZIF                           |                     | 35 | 350 | -     | 1,909.3                     | 29.1       | 147 |
|  | UV-20ZIF                           |                     | 35 | 350 | -     | 2,545.7                     | 27.2       | 147 |
|  | UV-30ZIF                           |                     | 35 | 350 | -     | 3,458.6                     | 26.9       | 147 |
|  | PIM-1/OPS                          | 20%                 | 25 | 400 | -     | 2,416 ± 126                 | 21.0 ± 2.0 | 148 |
|  | PIM-1/OAPS                         | 5%                  | 25 | 400 | -     | 3,266 ± 150                 | 20.8 ± 1.8 | 148 |
|  |                                    | 7.5%                | 25 | 400 | -     | 1,203 ± 60.2                | 25.2 ± 2.2 | 148 |
|  | CNT-ZIF-8-PDMS                     |                     | 25 | 100 | -     | 8,705                       | 45.6       | 60  |
|  | PPM-5@MMM                          |                     | 30 | 100 | -     | 3,443.9                     | 22.8       | 149 |
|  | PPM-10@MMM                         |                     | 30 | 100 | -     | 3,827.3                     | 24.0       | 149 |
|  | PPM-15@MMM                         |                     | 30 | 100 | -     | 1,470                       | 21         | 149 |
|  | PPM-20@MMM                         |                     | 30 | 100 | -     | 1,190                       | 20         | 149 |
|  | Cardo-PIM-1                        | 2.5 wt% o-MWCNTs    | 25 | 100 | -     | 23,000 ± 1,200 <sup>j</sup> | 20.9       | 150 |
|  |                                    | 7.5 wt% f-MWCNTs    | 25 | 100 | -     | 29,000 ± 1,500 <sup>j</sup> | 24.2       | 150 |
|  | PIM1/6FDA-DAM/ZIF-8(20:77:3 wt%)   |                     | 35 | 300 | -     | 2,611 ± 106 <sup>k</sup>    | 20.4 ± 0.8 | 151 |
|  | PDMS-PEO-Si(0.02)/CHNs(1.6)/PAN    |                     | 20 | 200 | 2,860 | -                           | 28.2       | 152 |
|  | PIM-1A/NanoMIL-101 (18% wt filler) |                     | 25 | 100 | -     | 2,830                       | 21.3       | 153 |
|  | PIM-1A/MIL-101A                    | 18% wt filler       | 25 | 100 | -     | 3,570                       | 21.6       | 153 |

<sup>j</sup> Mixed gas 1:1 CO<sub>2</sub>/N<sub>2</sub>

<sup>k</sup> Equimolar CO<sub>2</sub>/N<sub>2</sub> Mixture (10/90cm<sup>3</sup>(STP)min<sup>-1</sup>)



|                  |                                                    |                          |    |     |             |                          |            |     |
|------------------|----------------------------------------------------|--------------------------|----|-----|-------------|--------------------------|------------|-----|
|                  |                                                    | 39% wt filler + Ethanol  | 25 | 100 | -           | 22,500                   | 20.6       | 153 |
|                  |                                                    | 18% wt filler            | 25 | 100 | -           | 4,080                    | 21.9       | 153 |
|                  | PIM-1B/MIL-101B                                    | 30% wt filler            | 25 | 100 | -           | 8,960                    | 21.1       | 153 |
|                  |                                                    | 30% wt filler+ Methanol  | 25 | 100 | -           | 11,600                   | 20.0       | 153 |
|                  |                                                    | 47% wt filler            | 25 | 100 | -           | 7,550                    | 20.3       | 153 |
|                  | PIM-1B/NH <sub>2</sub> -MIL-101                    | 18% wt filler            | 25 | 100 | -           | 7,230                    | 20.0       | 153 |
|                  |                                                    | 18% wt filler + Methanol | 25 | 100 | -           | 10,200                   | 21.0       | 153 |
|                  | PPUN-28.6                                          |                          | 25 | 100 | 1,320       | -                        | 30.8       | 154 |
|                  | PEO/1% HPN                                         |                          | 35 | 100 | -           | ~1,900                   | ~44        | 62  |
|                  | PEO/0.5% HPN                                       |                          | 35 | 100 | -           | ~1,400                   | ~41        | 62  |
| Polymer net work | XS13-550                                           | Aged 15 days             | 30 | 200 | -           | 8,282.2                  | 23.5       | 155 |
|                  |                                                    | Aged 30 days             | 30 | 200 | -           | 6,215.6                  | 27.9       | 155 |
|                  |                                                    | Aged 60 days             | 30 | 200 | -           | 5,658.4                  | 28.1       | 155 |
|                  |                                                    | Aged 240 days            | 30 | 200 | -           | 5,286.5                  | 28.1       | 155 |
|                  | PEGMEA:PEGDA:PEGDME                                | 9:1:10                   | 35 | 350 | -           | 1709                     | 40.9       | 99  |
|                  |                                                    | 8:2:10                   | 35 | 350 | -           | 2178                     | 47.5       | 99  |
|                  |                                                    | 7:3:10                   | 35 | 350 | -           | 2980                     | 45.7       | 99  |
|                  |                                                    | 5:5:10                   | 35 | 350 | -           | 2463                     | 52.1       | 99  |
|                  |                                                    | 3:7:10                   | 35 | 350 | -           | 2365                     | 61.4       | 99  |
|                  |                                                    | 0:10:10                  | 35 | 350 | -           | 1767                     | 65.9       | 99  |
|                  |                                                    | 7:3:3                    | 35 | 350 | -           | 1409                     | 46.7       | 99  |
|                  |                                                    | 7:3:5                    | 35 | 350 | -           | 2095                     | 47.1       | 99  |
|                  |                                                    | 7:3:7                    | 35 | 350 | -           | 2461                     | 47.1       | 99  |
|                  |                                                    | 7:3:10                   | 35 | 350 | -           | 2980                     | 45.7       | 99  |
| Polymer Blends   | Pebax2533/PEG-b-PPFPA P2 <sub>1-1.5</sub> (60wt %) |                          | 35 | 350 | 3,330       | -                        | 22         | 156 |
|                  | Pebax2533/PEG-b-PPFPA P2 <sub>1-4.3</sub> (60wt %) |                          | 35 | 350 | 1,970       | -                        | 22         | 156 |
|                  | Pebax2533/PEG-b-PPFPA P2 <sub>1-7.6</sub> (60wt %) |                          | 35 | 350 | 1,650       | -                        | 25         | 156 |
|                  | PEBAX/PPEGMEA_70                                   |                          | 35 | 100 | -           | 1,388.3 ± 3.0            | 46.7 ± 0.6 | 98  |
|                  | Ultem-PIM                                          | 10:90                    | 35 | 350 | -           | 2,876.6                  | 20.0       | 157 |
|                  | Ultem-PIM                                          | 5:95                     | 35 | 350 | -           | 3,275.9                  | 21.1       | 157 |
|                  | PIM-1/Matrimid                                     | 90:10                    | 35 | 350 | -           | 1,953 ± 4.8              | 20 ± 1.7   | 158 |
|                  | PIM-1/Matrimid                                     | 95:5                     | 35 | 350 | -           | 3,355 ± 1.8              | 20 ± 0.3   | 158 |
|                  | PIM-1/6FDA-DAM (10:90 wt%)                         |                          | 35 | 300 | -           | 2,184 ± 152 <sup>k</sup> | 21.4 ± 1.4 | 151 |
|                  | 10 wt% PBP-menm                                    |                          | 35 | 100 | -           | 2,988 ± 365 <sup>b</sup> | 25.5 ± 0.8 | 159 |
|                  | r-200 %PEBA                                        |                          | 25 | 200 | 2,371 ± 179 | -                        | 44.9 ± 1.2 | 160 |
|                  | PPB-1.5                                            |                          | 30 | 200 | -           | 1,620.0                  | 23.8       | 161 |
|                  | PPB-3                                              |                          | 30 | 200 | -           | 1,577.4                  | 27.8       | 161 |

|                                           |                                                   |       |    |     |                          |                              |            |     |
|-------------------------------------------|---------------------------------------------------|-------|----|-----|--------------------------|------------------------------|------------|-----|
|                                           | PPB-5                                             |       | 30 | 200 | -                        | 1,552.6                      | 29.3       | 161 |
|                                           | PIM-1-10% MEEP100                                 |       | 22 | 160 | -                        | ~5,300 <sup>8</sup>          | ~24        | 162 |
|                                           | PIM-1-25% MEEP100                                 |       | 22 | 160 | -                        | ~3,000 <sup>8</sup>          | ~28        | 162 |
|                                           | PIM-1-10% MEEP80                                  |       | 22 | 160 | -                        | ~3,300 <sup>8</sup>          | ~24        | 162 |
|                                           | PIM-1-25% MEEP80                                  |       | 22 | 160 | -                        | ~3,100 <sup>8</sup>          | ~26        | 162 |
|                                           | cPIM-1/Torlon                                     | 90:10 | 35 | 350 | -                        | 1,013                        | 24         | 163 |
|                                           | cPIM-1/Torlon                                     | 95:5  | 35 | 350 | -                        | 1,382                        | 20.5       | 163 |
| Commercial polymers                       | Polaris™ gen1                                     |       | -  | -   | -                        | 1000                         | 50         | 46  |
|                                           | PolyActive™/85                                    |       | -  | -   | -                        | 1480                         | 55         | 47  |
|                                           | Pebax-1657/PDMS-PEO/PAN                           |       | 30 | 300 | 2,142                    | -                            | 36         | 164 |
|                                           | PolyActive™(PA <sub>1.25</sub> )                  |       | 35 | 50  | 3,555                    | -                            | 40         | 165 |
| Facilitated transport polymeric membranes | Pebax-[C <sub>6</sub> MIM][Gly]-20                |       | 25 | 200 | -                        | ~1,500                       | ~95        | 63  |
|                                           | Pebax [C <sub>6</sub> MIM][Gly] 30% wt            |       | 25 | 100 | -                        | ~1,900                       | ~60        | 63  |
|                                           | Pebax [C <sub>4</sub> MIM][Gly] 20% wt            |       | 25 | 100 | -                        | ~1,100                       | ~110       | 63  |
|                                           | C(30)-P(1:1)                                      |       | 25 | 200 | -                        | ~1,650                       | ~55        | 64  |
|                                           | C(30)-P(2:1)                                      |       | 25 | 200 | -                        | ~1,200                       | ~60        | 64  |
|                                           | TMC/DNMDAm/DGBAmE                                 |       | 22 | 110 | 1,612 <sup>a</sup>       | -                            | 138        | 166 |
|                                           | Pebax-PEI-MCM-41-15                               |       | 25 | 100 | -                        | 1,015                        | 94         | 65  |
|                                           | Pebax-PEI-MCM-41-20                               |       | 25 | 100 | -                        | 1,521                        | 102        |     |
|                                           | 15% wt{[Cu(6)]2+@13X}/6FDA-Durene                 |       | 35 | 200 | -                        | ~1,034                       | 38.3       | 66  |
|                                           | Pebax 1657/MWNTs-NH <sub>2</sub> /GTA (P10CN1G25) |       | 35 | 700 |                          | 1,408                        | ~40        | 67  |
|                                           | Pebax 1657/SG 20 wt %                             |       | 25 | 200 | -                        | ~1,200                       | ~55        | 68  |
|                                           | 44.4 wt% HMMP-1-PVAm                              |       | 25 | 200 | 1,544 <sup>a</sup>       | -                            | 252        | 167 |
|                                           | PVAm/PEI-g-ZIF-8(5:40:1)                          |       | 25 | 300 | 1,990 ± 148 <sup>a</sup> | -                            | 79.9 ± 2.0 | 168 |
|                                           | PIL-IL/GO (410 ppm CO <sub>2</sub> feed)          |       | 22 | 100 | 3,092 <sup>a</sup>       | -                            | 1189       | 30  |
|                                           | DNMDAm-CD0.20/TMC                                 |       | 25 | 150 | 2,792 <sup>a</sup>       | -                            | 171        | 169 |
|                                           | PIP-CMC/TMC                                       |       | 25 | 150 | ~1,479 <sup>a</sup>      | -                            | 119        | 170 |
|                                           | PIP-CMC/TMC                                       |       | 25 | 150 | ~1,278                   | -                            | 89         |     |
|                                           | PVA/amine modified SiO <sub>2</sub> /[bmim][Tf2N] |       | 30 | 200 | 3,016                    | -                            | 62.08      | 102 |
|                                           | CA/PM-4 (1:0.5 % w/w)                             |       | 35 | 300 | -                        | 2,000                        | 44.4       | 69  |
|                                           | CA/PM-4 (1:1 % w/w)                               |       | 35 | 300 | -                        | 2,392                        | 51         |     |
|                                           | CA/PM-4 (1:3 % w/w)                               |       | 35 | 300 | -                        | 3,000                        | 59         |     |
|                                           | 10% MOF-303                                       |       | 35 | 300 | -                        | 6,602.8 ± 256.2 <sup>b</sup> | 25.6 ± 0.9 | 171 |
|                                           | PIM-Py-Cl 5%                                      |       | 25 | 200 | -                        | 3,393.3                      | 35         | 70  |
|                                           | PIM-Py-Cl 10%                                     |       | 25 | 200 | -                        | 4,188.3                      | 39         | 70  |

|  |                            |    |     |   |         |    |    |
|--|----------------------------|----|-----|---|---------|----|----|
|  | PIM-Py-Cl 15%              | 25 | 200 | - | 4,959.8 | 42 | 70 |
|  | PIM-Py-Ac 5%               | 25 | 200 | - | 3,722.9 | 38 | 70 |
|  | PIM-Py-Ac 10%              | 25 | 200 | - | 4,690.8 | 47 | 70 |
|  | PIM-Py-Ac 15%              | 25 | 200 | - | 6,204.8 | 62 | 70 |
|  | PIM-Py-BF <sub>4</sub> 5%  | 25 | 200 | - | 2,991.6 | 32 | 70 |
|  | PIM-Py-BF <sub>4</sub> 10% | 25 | 200 | - | 4,693.7 | 46 | 70 |
|  | PIM-Py-BF <sub>4</sub> 15% | 25 | 200 | - | 5,584.3 | 46 | 70 |

#

Table S2: CO<sub>2</sub> purity requirements for downstream applications.

| Post Capture Application                                            | Required CO <sub>2</sub> Purity | Ref     |
|---------------------------------------------------------------------|---------------------------------|---------|
| Geological Sequestration                                            | >98 %                           | 105     |
| Oil Recovery                                                        | >99.9%                          | 172     |
| Carbonation (e. g. Beverage)                                        | >99.9%                          | 173     |
| Welding (industrial)                                                | >99.5%                          | 174     |
| Chemical reduction (research)                                       | >99.99%                         | 174     |
| Algae Utilization                                                   | <40%                            | 109,175 |
| Agriculture feedstock (e. g. Greenhouse CO <sub>2</sub> Supplement) | 1000-1500 ppm                   | 176     |
